# Supplementary material for: Facile preparation of a Na2MnSiO4/C/graphene composite as a high performance cathode for sodium ion batteries
Source: Royal Society of Chemistry journal article supplement (doi:10.1039/c7ra00198c), 2017-01-01
Supplement: c7ra00198c1.pdf [file c7ra00198c1.pdf]

# Facile preparation of $\text{Na}_2\text{MnSiO}_4/\text{C}/\text{graphene}$ composite as a high performance cathode for sodium ion batteries

*Hai Zhu, Juntao Wang, Xiaoling Liu, and Xiaoming Zhu\**

R & D Center for Non-power Nuclear Technology, School of Nuclear Technology and Chemistry & Biology, Hubei University of Science and Technology, Xianning 437100, China

\*Corresponding author. [energy603@163.com](mailto:energy603@163.com)

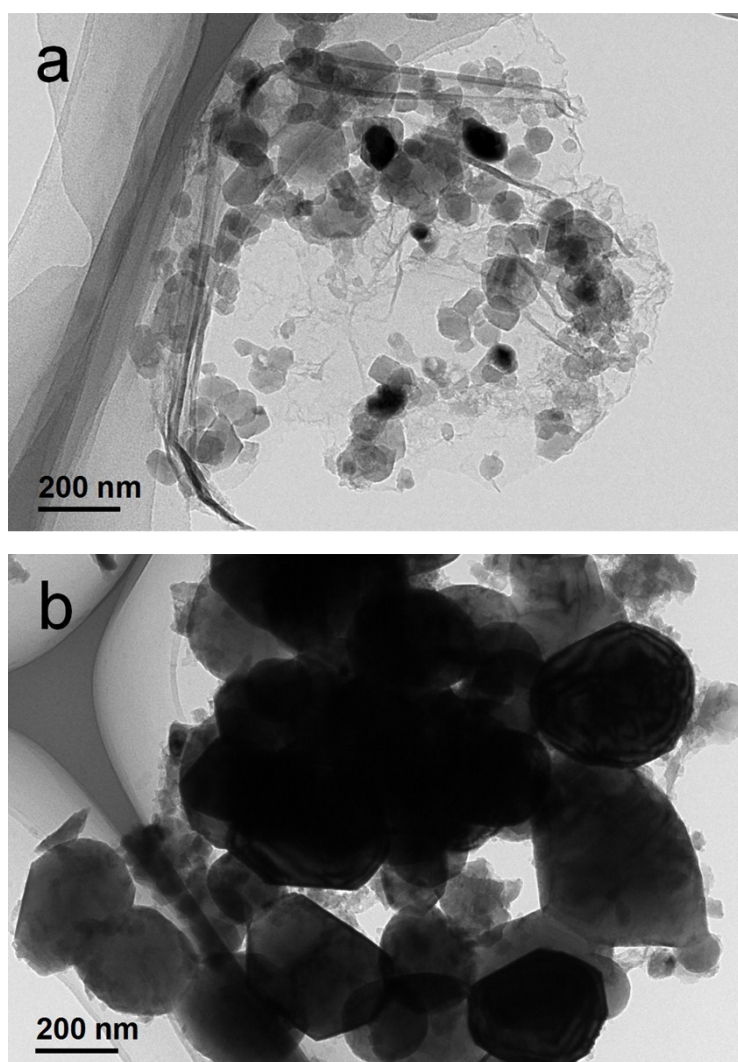

Figures S1. The TEM images of the (a) $\text{Na}_2\text{MnSiO}_4/\text{G}$  prepared with the only GO and the (b)  $\text{Na}_2\text{MnSiO}_4/\text{C}$  prepared with the same amount of glucose to  $\text{Na}_2\text{MnSiO}_4/\text{C}/\text{G}$ .

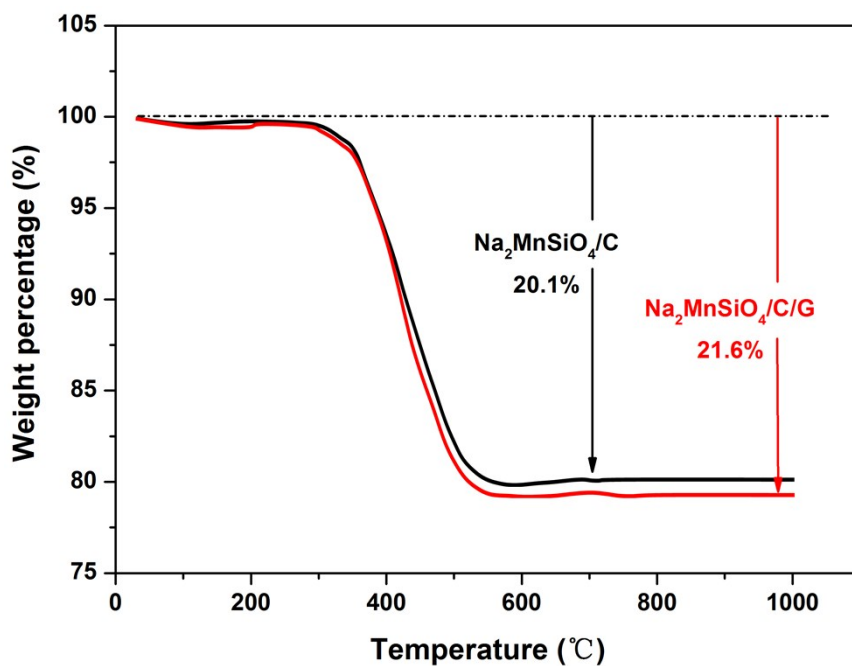

Figure S2 Thermal gravimetric analysis curves of the  $\text{Na}_2\text{MnSiO}_4/\text{C}$  and  $\text{Na}_2\text{MnSiO}_4/\text{C}/\text{G}$  composites.

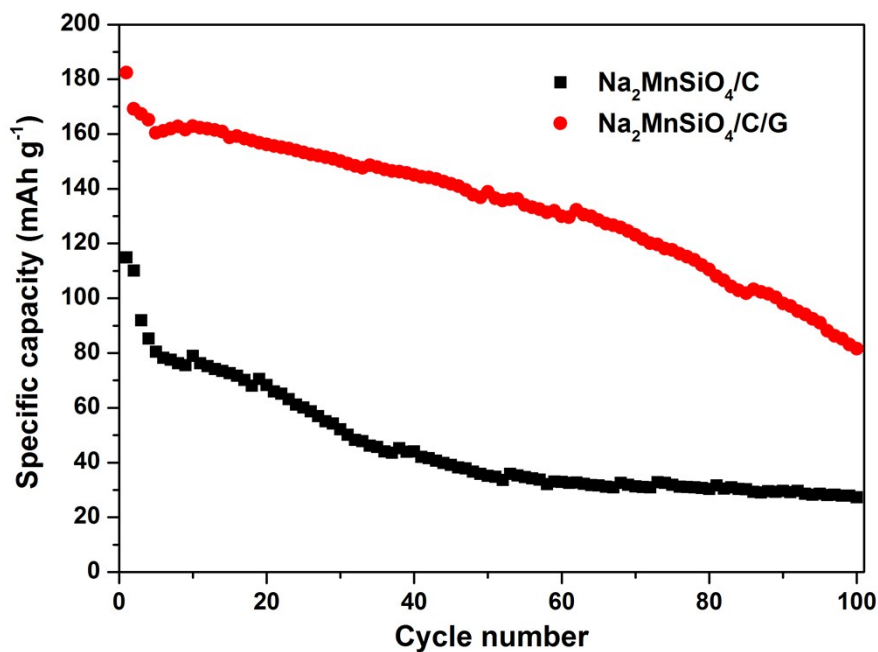

Figure S3 The cycling performances of the  $\text{Na}_2\text{MnSiO}_4/\text{C}$  and  $\text{Na}_2\text{MnSiO}_4/\text{C}/\text{G}$  composites at the rate of 0.1 C (1 C = 139 mAh g<sup>-1</sup>) at room temperature.
